# Supplementary material
Source: PubMed Central journal article supplement (PMC4119554)
Supplement: NIHMS600666-supplement-01.pdf [file NIHMS600666-supplement-01.pdf]

Supplemental Table 1. List of SNPs analyzed and their role in Vitamin D pathway

| Chromosome | Gene                            | Name                                                | SNP                      | Role                                                                                                                         |
|------------|---------------------------------|-----------------------------------------------------|--------------------------|------------------------------------------------------------------------------------------------------------------------------|
| 4          | <i>GC</i>                       | Group-Component                                     | rs7041<br>rs2298849      | Involved in transport of vitamin D <sub>3</sub> ; encodes vitamin D binding protein                                          |
| 11         | <i>CYP2R1</i>                   | Vitamin D 25-hydroxylase                            | rs10766196<br>rs10741657 | Converts vitamin D into active ligand for vitamin D receptor                                                                 |
| 11         | <i>NADSYN1/</i><br><i>DHCR7</i> | 7-dehydrocholesterol reductase                      | rs4944957<br>rs12800438  | Encodes 7-dehydrocholesterol reductase. Both SNPs are located in intronic region of <i>NADSYN1</i> (near <i>DHCR7</i> gene). |
| 12         | <i>VDR</i>                      | Vitamin D receptor                                  | rs739837<br>rs886441     | Encodes nuclear hormone receptor for vitamin D <sub>3</sub>                                                                  |
| 15         | <i>OCA2</i>                     | Oculocutaneous albinism II                          | rs1800404                | Encodes p-protein, triggers transport of small molecules into melanosomes                                                    |
| 15         | <i>SLC24A5</i>                  | Solute carrier 24 family member 5                   | rs1426654                | Potassium-dependent sodium/calcium exchanger; associated with differences in skin pigmentation                               |
| 20         | <i>ASIP</i>                     | Agouti signaling protein                            | rs6058017                | Antagonist of MC1R, blocks the pigmentation cascade leading to synthesis of pheomelanin (26)                                 |
| 20         | <i>CYP24A1</i>                  | 1,25-dihydroxyvitamin D <sub>3</sub> 24-hydroxylase | rs2762941                | Initiates degradation of 1,25-dihydroxyvitamin D <sub>3</sub> , by hydroxylation of the side chain.                          |
